# Supplementary material for: Spatial confinement alters the ultrafast photoisomerization dynamics of azobenzenes
Source: Royal Society of Chemistry journal article supplement (doi:10.1039/d0sc03955a), 2020-01-01
Supplement: d0sc03955a1.pdf [file d0sc03955a1.pdf]

# Supporting Information for: Spatial Confinement Alters the Ultrafast Photoisomerization Dynamics of Azobenzenes

Christopher J. Otolski,<sup>†,¶</sup> A. Mohan Raj,<sup>‡</sup> Vaidhyanathan Ramamurthy,<sup>\*,‡</sup> and  
Christopher G. Elles<sup>\*,†</sup>

<sup>†</sup>*Department of Chemistry, University of Kansas, Lawrence, KS 66045, United States*

<sup>‡</sup>*Department of Chemistry, University of Miami, Coral Gables, FL 33146, United States*

<sup>¶</sup>*Present address: Chemical Sciences and Engineering Division, Argonne National  
Laboratory, Lemont, IL 60439, United States*

E-mail: [murthy1@miami.edu](mailto:murthy1@miami.edu); [elles@ku.edu](mailto:elles@ku.edu)

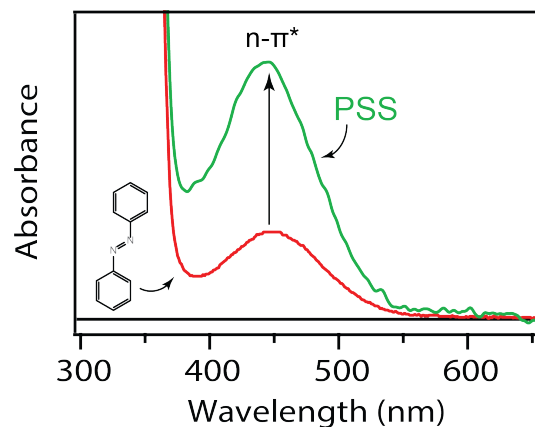

Figure S1: Ground-state absorption spectra in the region of the  $n\pi^*$  absorption band for  $t\text{-Az@OA}_2$  (red) and the mixture of  $t\text{-Az@OA}_2$  and  $c\text{-Az@OA}_2$  isomers at photo-stationary state (PSS; green). We obtain PSS by continuously irradiating the sample of encapsulated  $t\text{-Az}$  with a 310 nm UV LED. The stronger absorption at PSS is due to formation of the *cis* isomer. We estimate a relative concentration of 23%  $c\text{-Az@OA}_2$  and 77%  $t\text{-Az@OA}_2$  at PSS.

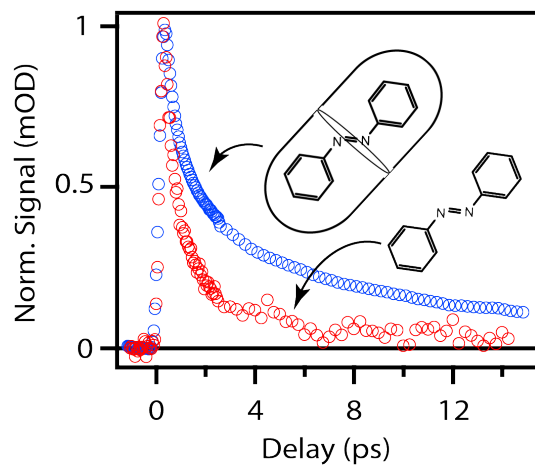

Figure S2: Comparison of excited-state decay at the absorption maximum near 400 nm following  $\pi\pi^*$  excitation of  $t\text{-Az}$  in cyclohexane and  $t\text{-Az@OA}_2$ .

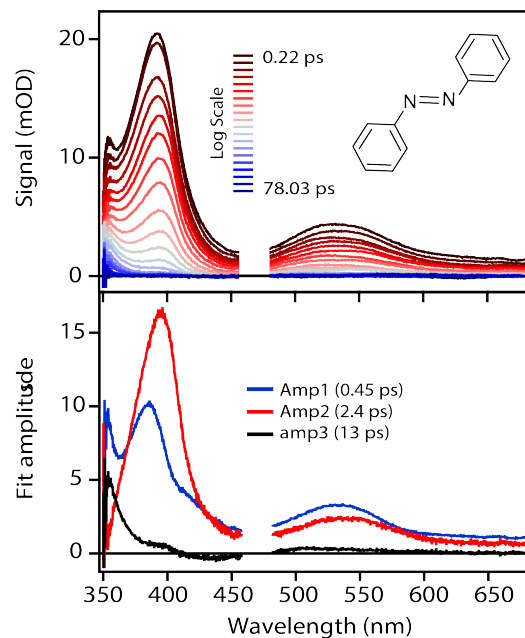

Figure S3: Top: Evolution of the TA spectrum following  $n\pi^*$  excitation of *t*-Az in cyclohexane. Bottom: Decay associated spectra (DAS) from global fits to the TA data using a sum of 3 exponentials. The lifetimes associated with each spectrum are shown in the inset.

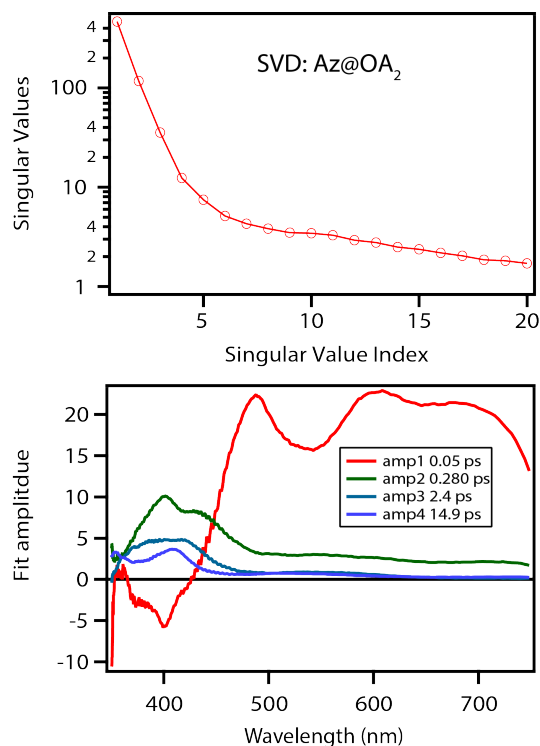

Figure S4: Top: Results from singular value decomposition (SVD) of the TA spectrum for  $t$ -Az@OA<sub>2</sub> indicating that at least four time constants are necessary to accurately reproduce the experimental data (at a threshold of 2%). The bottom panel shows the decay associated spectra (DAS) from global fits to the TA data using a sum of 4 exponentials. The associated lifetimes are shown in the inset. Notice that none of the DAS resemble the hot ground-state spectrum ( $S_0^*$  in the main text) that becomes evident when including a fifth time constant in the target analysis (see main text).

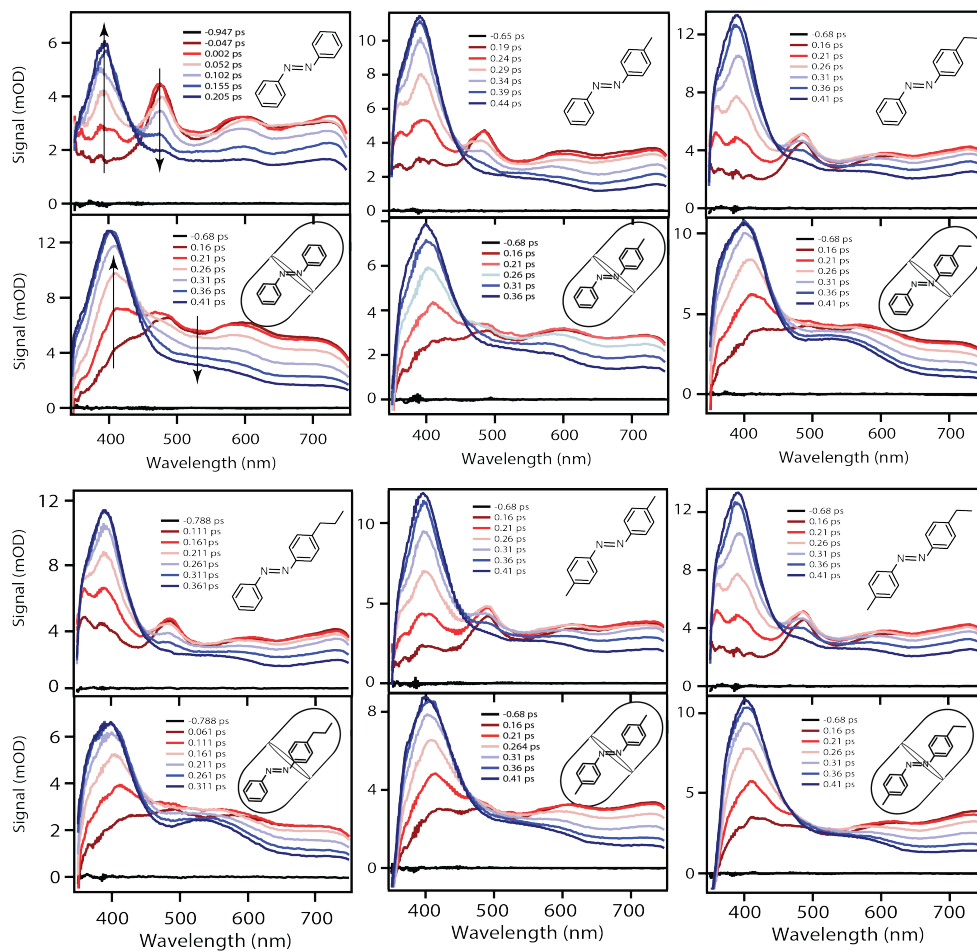

Figure S5: Evolution of the TA spectrum over the first  $\sim 400$  fs following  $\pi\pi^*$  excitation of *t*-Az in cyclohexane and *t*-Az@OA<sub>2</sub>. See Figure S6 for longer time delays.

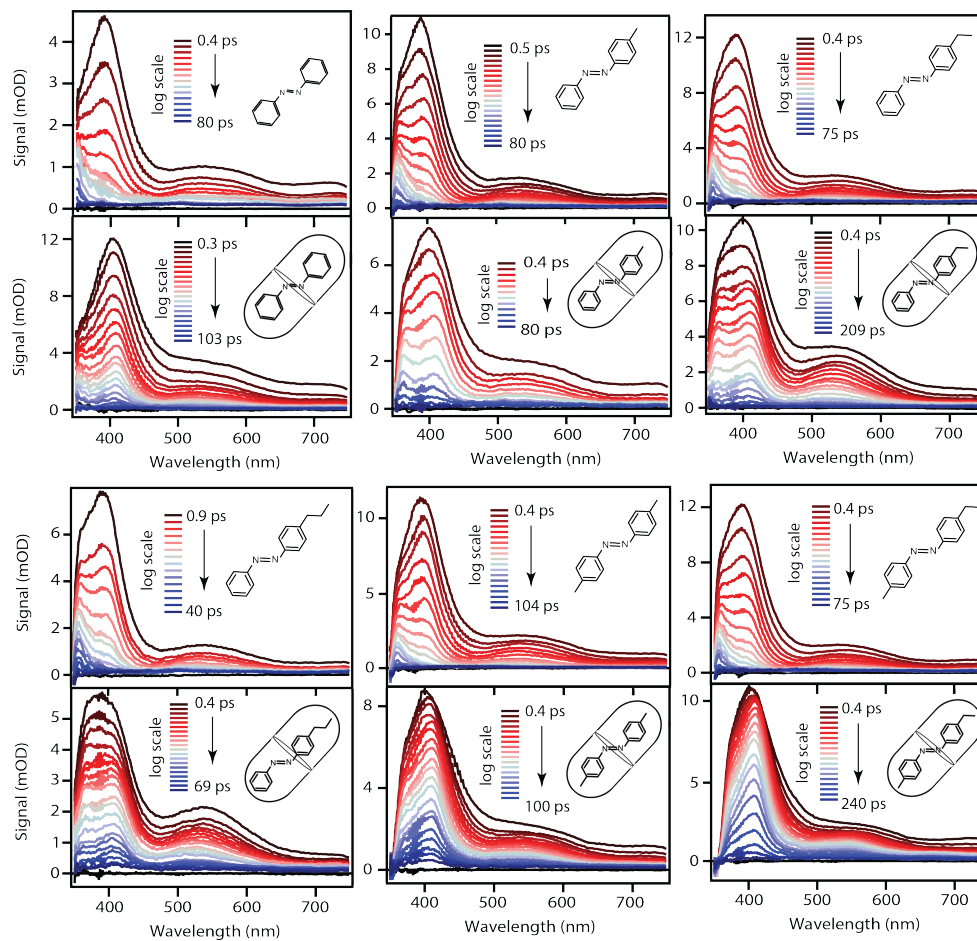

Figure S6: Evolution of the TA spectrum from  $\sim 0.3$  ps to  $\sim 100$  ps following  $\pi\pi^*$  excitation of *t*-Az in cyclohexane and *t*-Az@OA<sub>2</sub>. See Figure S5 for shorter time delays.

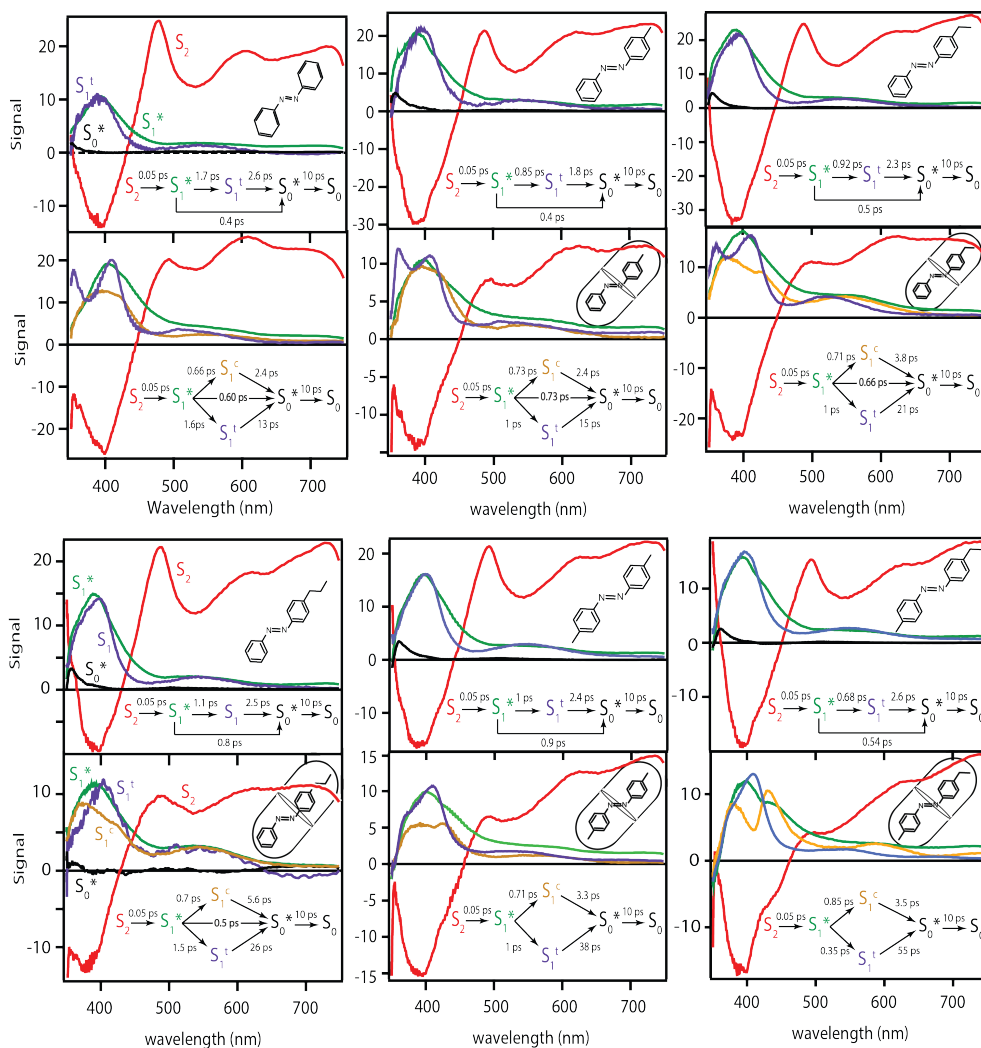

Figure S7: Species associated spectra (SAS) from global fits to the TA data using the kinetic models shown as insets following  $\pi\pi^*$  excitation of each *t*-Az derivative in cyclohexane and in the  $\text{OA}_2$  capsule. Lifetimes from each fit are shown in the insets. See main text for details.
